1 **Contrasting patterns of coding and flanking region evolution in mammalian keratin**  
2 **associated protein-1 genes**

3

4 Huitong Zhou<sup>1,2,\*</sup>, Tina Visnovska<sup>3,†</sup>, Hua Gong<sup>1,2</sup>, Sebastian Schmeier<sup>3</sup>, Jon Hickford<sup>1,2</sup>, and  
5 Austen R.D. Ganley<sup>4,\*</sup>

6

7 1 State Key Laboratory of Sheep Genetic Improvement and Heathy Production, Shihezi  
8 832000, China

9 2 Faculty of Agricultural and Life Sciences, Lincoln University, Lincoln 7647, New  
10 Zealand

11 3 Institute of Natural and Mathematical Sciences, Massey University Auckland,  
12 Auckland 0632, New Zealand

13 4 School of Biological Sciences, University of Auckland, Auckland 1142, New Zealand

14

15 † Huitong Zhou and Tina Visnovska should be considered joint first author

16

17 **Running title:**

18 Contrasting *KRTAP1* evolutionary patterns

19

20 **Key words:**

21 concerted evolution, gene conversion, keratin associated protein, *krtap1*, tandem repeat,

22 recombination

23

24 **Author contributions:**

25 ARDG and HZ conceived of the study. HZ, HG, and JH collected the data. TV, HZ, and ARDG

26 performed analyses. HZ, TV, HG, SS, JH, and ARDG interpreted the data and wrote the

27 manuscript.

28

29 **To whom correspondence should be addressed:**

30 **Austen Ganley:** School of Biological Sciences, University of Auckland, 3A Symonds St,

31 Building 110N, Auckland 1142, New Zealand; +64 9 923 2906; [a.ganley@auckland.ac.nz](mailto:a.ganley@auckland.ac.nz)

32

33 **Huitong Zhou:** Faculty of Agriculture and Life Sciences, Lincoln University,

34 Cnr Springs Road & Ellesmere Junction Road, Lincoln 7647, New Zealand; +64 3 423 0684;

35 [zhouh@lincoln.ac.nz](mailto:zhouh@lincoln.ac.nz)

36

37 **Acknowledgements:**

38 This work was supported by a Marsden Fund award (14-MAU-053) to ARDG, an AGMARDT

39 Postdoctoral Fellowship to HG, and a Vernon Willey Trust Fellowship to HZ.

40

41

42 **Abstract**

43 DNA repeats are common in eukaryotic genomes, and recombination between copies can occur.  
44 This recombination can result in concerted evolution, where within-genome repeats are more  
45 similar to each other than to orthologous repeats in related species. We investigated the  
46 tandemly-repeated keratin-associated protein (KAP) gene family, *KRTAPI*, which encodes  
47 proteins that are important components of hair and wool in mammals. Comparison of *KRTAPI*  
48 gene repeats across the mammalian phylogeny shows strongly contrasting evolutionary patterns  
49 between the coding regions, that have a concerted evolution pattern, and the flanking regions,  
50 that have a normal, radiating pattern of evolution. This dichotomy transitions abruptly at the start  
51 and stop codons, and is not the result of purifying selection, codon adaptation, or reverse  
52 transcription of *KRTAPI-n* mRNA. Instead, our results suggest that short-tract gene conversion  
53 events coupled with selection for these events in the coding region drives the contrasting  
54 *KRTAPI* repeat evolutionary patterns. Our work shows the power that repeat recombination has  
55 to complement selection and shape the evolution of repetitive genes, and this interplay may be a  
56 more common mechanism than currently appreciated for achieving adaptive outcomes in  
57 eukaryotic multi-gene families. Thus, our work argues for greater emphasis on exploring the  
58 evolution of these families.

59

## 60 **Introduction**

61 Repetitive DNA is widespread in most eukaryote genomes (Britten and Kohne 1968; Richard, et  
62 al. 2008; Lopez-Flores and Garrido-Ramos 2012). There are two basic repeat DNA types:  
63 tandem repeats that are typically arranged in head-to-tail arrays; and dispersed repeats, and these  
64 can occur in either coding or non-coding DNA. Repeats are thought to arise from recombination-  
65 based duplication/amplification events (Stephan 1989). Sequence identity between duplicates  
66 will then decay through the diversifying force of mutation, unless counteracting processes  
67 operate (Brown, et al. 1972; Dover 1982). The balance between duplication, diversification,  
68 selection, and counteracting forces thus dictate the evolutionary dynamics of repeats. Two main  
69 paradigms have been proposed to account for the long-term maintenance of repeat identity:  
70 concerted evolution and birth-and-death evolution. Concerted evolution describes a pattern of  
71 evolution where the repeats within a genome show greater sequence identity to each other than to  
72 orthologous repeats in related genomes (Elder and Turner 1995). The pattern of concerted  
73 evolution is proposed to result from recombination-based processes, such as gene conversion and  
74 unequal cross-over events, that replace the DNA sequence from one repeat with that from  
75 another repeat (Liao 1999). In so doing, these recombination processes maintain sequence  
76 identity between repeat copies in the face of mutation, and thus homogenize the repeats (Dover  
77 1982). ‘Birth-and-death’ evolution involves purifying selection maintaining sequence identity  
78 between repeats that are generated by occasional duplication events (i.e. birth), as well as death,  
79 which results from repeat loss or pseudogenization (Nei, et al. 1997; Nei, et al. 2000). While  
80 there has been debate as to which of these processes best describes the evolutionary dynamics of  
81 repetitive DNA (Nei and Rooney 2005; Rooney and Ward 2005; Eirin-Lopez, et al. 2012), a  
82 basic characterization of the evolutionary dynamics of most repeat families is lacking.

83 The keratin-associated proteins (KAPs) are a diverse group of proteins, and are rich in either  
84 sulphur, or glycine and tyrosine. They are important structural components of hair and wool  
85 fibres, and form a matrix that cross-links the keratin intermediate filaments. The genes encoding  
86 the KAPs are called *KRTAPs* (Gong, et al. 2012), and can be classified into 27 families, with  
87 each family comprising 1-12 members that are usually tandemly arranged (Rogers and  
88 Schweizer 2005; Rogers, et al. 2006; Gong, et al. 2016). The *KRTAPs* are single exon (intron-  
89 less) genes, with small coding sequences (less than 1 kb) (Rogers and Schweizer 2005), and they  
90 have low numbers of pseudogenes. For example, in humans the pseudogene:gene *KRTAP* ratio is  
91 approximately 1:5 (Gong, et al. 2016), while across all human genes the ratio is close to 1:1  
92 (Torrents, et al. 2003; Stein 2004). In addition, the *KRTAPs* show high levels of population  
93 variation, with all known *KRTAP* genes being polymorphic in sheep (Gong, Zhou, McKenzie, et  
94 al. 2010; Gong, et al. 2016; Zhou, et al. 2016), where they are well studied because of their roles  
95 in determining wool phenotypes (Zhou, et al. 2015; Li, Zhou, Gong, Zhao, Hu, et al. 2017; Li,  
96 Zhou, Gong, Zhao, Wang, Liu, et al. 2017; Li, Zhou, Gong, Zhao, Wang, Luo, et al. 2017; Tao,  
97 Zhou, Gong, et al. 2017; Tao, Zhou, Yang, et al. 2017). Despite this variation, it has been  
98 reported that at least some *KRTAP* genes show a pattern of concerted evolution between the  
99 paralogous gene copies (Rogers, et al. 1994; Wu, et al. 2008; Khan, et al. 2014).

100 The KAP1 proteins form the best characterised KAP family, and they show a high degree of  
101 sequence heterogeneity compared to other KAP families. These KAP1 proteins appear to be  
102 restricted in expression to the middle to upper cortex region of the hair and wool follicle, and are  
103 absent in the cuticle (Powell and Rogers 1997; Shimomura, et al. 2002). Their precise role in hair  
104 and wool function, has yet to be determined. The genes encoding the KAP1 proteins (*KRTAP1-*  
105 *n*) have been characterized in a number of mammalian species, where they are usually arranged

106 as four tandem copies (**Figure 1**) (Khan, et al. 2014). The coding regions of the *KRTAPI-n* genes  
107 vary in length within species, predominantly as a consequence of variation in the number of  
108 imperfect tandem decapeptide repeat units (Gong, et al. 2016) (**Figure 1**).

109 Here we analyse the *KRTAPI* genes from a number of mammalian species, including four  
110 species for which the *KRTAPI-n* loci have not been described. Together with the existing  
111 *KRTAPI-n* sequences, we reveal that the *KRTAPI-n* coding regions display a pattern of  
112 concerted evolution. In stark contrast to the coding region though, we find that the repeat  
113 flanking regions display no evidence of concerted evolution, and instead appear to be evolving  
114 by normal vertical or radiating evolution. Surprisingly, we find that this pattern of coding region  
115 restricted concerted evolution is not the result of purifying selection, nor does it result from  
116 codon adaptation or reverse transcription/reintegration of *KRTAPI-n* mRNA sequences. Instead,  
117 the results are best explained by a combination of on-going short-tract gene conversion events  
118 between the *KRTAPI-n* copies, and negative selection. We argue that these gene conversion  
119 events act as an unusual mechanism of purifying selection to prevent excessive intra-genomic  
120 divergence between the four gene copies, while also allowing inter-species diversity. This  
121 unusual mode of evolution may apply to other multicopy genes that encode products subject to  
122 diversifying selection.

123

124

125 **Materials and Methods**

126 **Sequence Resources and Gene Identification:** All genome sequences were sourced from the  
127 NCBI GenBank. Previously identified *KRTAPI-n* sequences (Itenge-Mweza, et al. 2007; Wu, et  
128 al. 2008; Gong, Zhou and Hickford 2010; Gong, et al. 2011) were used to search the genomes of  
129 cattle, horses, rabbits and African elephants using BLAST with default parameters, and the genes  
130 retrieved were identified by sequence identity within both the coding and flanking regions  
131 (**Table S1**).

132 **Sequence Alignments:** *KRTAPI* nucleotide sequences (**Table S1**) for all four paralogs from the  
133 ten species (sheep, cattle, dog, elephant, horse, human, macaque, mouse, rat and rabbit) were  
134 separated into 5' flanking regions, coding sequences, and 3' flanking regions. The multiple  
135 sequence alignment tool *mafft* (v7.123b) (Kato and Standley 2013) was used to separately align  
136 the 5' and 3' flanking regions as nucleotide sequences, using the arguments ‘--nuc --localpair --  
137 maxiterate 1000’. To align the coding sequences at the predicted amino acid level, *mafft* with the  
138 arguments ‘--amino --localpair --maxiterate 1000’ was run.

139 The coding sequence alignment was subsequently reverse translated using *revTrans* (v1.4)  
140 (Wernersson and Pedersen 2003) with two input files: the sequences of all the coding regions,  
141 and the amino acid sequence alignments. The sequences in the two files were paired by name  
142 using the ‘-match name’ parameter, and default values were used for all other parameters. A  
143 number of regions align poorly and have many indels, therefore we used the longest continuous  
144 coding sequence block (198 nucleotides; covers on average around 40% of the coding region)  
145 where none of the 40 sequences had indels. For the flanking region alignments, we used *Gblocks*  
146 (v0.91b) (Talavera and Castresana 2007) to select blocks that cover approximately 40% of the  
147 flanking regions having the best alignment. We also used *Gblocks* with less stringent criteria to



148 create multiple sequence alignments of the coding and flanking regions that included more  
149 poorly aligning regions.

150 **Phylogenetic Trees:** *PhyML* (v3.1) (Guindon, et al. 2010) was used to construct phylogenies  
151 based on the coding and flanking region sequences. The number of resampled bootstrap data sets  
152 was set to 1000 (parameter ‘-b 1000’), and the additional arguments ‘-q -s BEST -o tlr’ were  
153 employed. The Bioconductor package *ggtree* (v1.9.4) (Yu, et al. 2017) was used to plot the  
154 phylogenies.

155 **Codon Adaptation Index:** The CAIcal server (<http://genomes.urv.es/CAIcal>) (Puigbo, et al.  
156 2008) was used to calculate CAI values for the *KRTAPIs*, as well as expected CAI values from  
157 permuted sequences using default parameters and published codon usage data (Nakamura, et  
158 al. 2000).

159 **Motifs in the Coding Sequences:** We used MEME motif finder (v4.12.0) (Bailey, et al. 2006) to  
160 explore repetitive elements in the coding sequences. The repetitive structure of the coding  
161 regions reported in the Results was obtained with parameters ‘-dna -oc . -nostatus -time 18000 -  
162 maxsize 60000 -mod anr -nmotifs 6 -minw 6 -maxw 30 -minsites 20 -maxsites 600 -revcomp’  
163 and all the other parameters set to the default values.

164 ***KRTAPI-n* Polymorphism in Sheep:** Intra-specific variation was assessed using three  
165 sequences for *KRTAPI-1* (Itenge-Mweza, et al. 2007), eleven sequences for *KRTAPI-2* (Gong, et  
166 al. 2011; Gong, et al. 2015), nine sequences for *KRTAPI-3* (Itenge-Mweza, et al. 2007), and nine  
167 sequences for *KRTAPI-4* (Gong, Zhou and Hickford 2010). These were aligned using  
168 DNAMAN (v5.2.10; Lynnon BioSoft, Canada) with default parameters, and polymorphic sites  
169 were identified manually.

170 **Data Availability:** Sequence data are available at GenBank and the accession numbers and  
171 positions are listed in the **Materials and Methods** (sheep polymorphism data) and Table S1  
172 (*KRTAPI* sequences).

173

174

## 175 **Results**

### 176 **Mammalian *KRTAPI-n* repeats show a concerted evolution pattern in the coding but not** 177 **the flanking regions**

178 To better understand the genetic architecture of the mammalian *KRTAPI* cluster, we selected the  
179 *KRTAPI* genomic region from key members of the mammalian phylogeny for analysis. The  
180 Basic Local Alignment Search Tool (BLAST) was used to search GenBank with known  
181 *KRTAPI-n* sequences to identify and retrieve the *KRTAPI* clusters from the genomes of four  
182 species (cattle, horses, rabbits and African elephants) for whom *KRTAPI-n* sequence information  
183 has not been reported (**Figure S1**). We then combined these with previously-identified *KRTAPI-*  
184 *n* sequences from other mammalian species to obtain sampling across the mammalian phylogeny  
185 (**Figure 2**).

186 Previously, the *KRTAPI* genes of sheep were shown to contain a variable number of occurrences  
187 of a QTSCCQPXXX decapeptide tandem repeat in the N-terminal region of the protein (Rogers,  
188 et al. 1994; Gong, et al. 2011; Gong, et al. 2016). We used a motif finding tool (MEME; (Bailey,  
189 et al. 2006) to search for repetitive motifs in the coding regions of all the mammalian *KRTAPI-n*  
190 sequences. This revealed that the decapeptide repeat is present at the N-terminus in all

191 mammalian *KRTAPI-n* genes we obtained (**Figure S2**), albeit with less amino acid conservation  
192 than that observed in sheep. MEME also identified nucleotide level tandem copies of this repeat  
193 at the C-terminus of the protein. Furthermore, both the N- and C-terminal repeats vary in copy  
194 number, within and between genomes. This copy number variation is responsible for much of the  
195 length variation between *KRTAPI-n* sequences.

196 To determine the genetic relationships between of the mammalian *KRTAPI-n* genes, we  
197 generated a *KRTAPI* phylogenetic tree from an alignment of our mammalian *KRTAPI-n* coding  
198 region sequences. This revealed that, in most cases, the *KRTAPI* genes are more related to each  
199 other within a species than to their orthologs in other species, thus exhibiting a concerted  
200 evolution pattern. This manifests as clades that group by species, rather than by repeat, in the  
201 phylogenetic tree (**Figure 3**). This concerted evolution pattern breaks down between the most  
202 closely-related species pairs (cattle/sheep, rat/mouse, human/macaque), presumably because the  
203 signal is confounded by these species having more recent shared ancestry. Nevertheless, for most  
204 species there is a clear pattern of concerted evolution.

205 For concertedly evolving tandem repeat sequences such as the ribosomal RNA gene repeats,  
206 homogenization occurs for the complete repeat unit, including the non-coding regions (Ganley  
207 and Kobayashi 2007). To test whether the *KRTAPI* clusters display a ‘whole-unit’ pattern of  
208 concerted evolution, we generated *KRTAPI* phylogenetic trees from multiple alignments of the  
209 5’ and 3’ flanking sequences of the mammalian *KRTAPI* genes. Surprisingly, the phylogenies  
210 derived from these flanking sequences did not show any pattern of concerted evolution, and in  
211 contrast to the coding region phylogeny, the clades in these phylogenetic trees were group by  
212 *KRTAPI* repeat number, not by species (**Figure 3**). We note that bootstrap support is not strong  
213 for all the clades in these phylogenetic trees, but the contrast between the coding region

214 concerted versus flanking region radiating evolutionary patterns is unmistakable. Furthermore,  
215 the topology within many of the *KRTAPI* flanking region clades is consistent with the reported  
216 mammalian phylogeny (refer to **Figures 2** and **3**). These phylogenies were generated from  
217 multiple sequence alignments that encompass the regions that align well, but phylogenies  
218 derived from sequence alignments that include poorly aligned regions give qualitatively similar  
219 results (**Figure S3**). Overall, in stark contrast to the coding region, the flanking regions show a  
220 phylogenetic pattern expected for normal radiating evolution, and exhibit no evidence of  
221 concerted evolution.

222

223 **What is responsible for the different evolutionary patterns of the *KRTAPI* coding and**  
224 **flanking regions?**

225 The difference in evolutionary pattern between the coding and flanking regions is striking, hence  
226 we sought to identify the mechanism(s) responsible.

227 **Purifying selection:** Previous studies have shown that multi-gene loci undergoing birth-and-  
228 death evolution can show high levels of identity within the coding region due to strong purifying  
229 selection (Nei, et al. 2000; Piontkivska, et al. 2002). It is possible that purifying selection  
230 maintains sequence identity between *KRTAPI-n* copies within a species, whilst diversifying  
231 selection results in differences between species. If so, we would predict that while the non-  
232 synonymous sites would show a concerted evolution pattern, the synonymous sites would instead  
233 show a normal radiating pattern of evolution (resembling the flanking regions).

234 To investigate this, we looked at the pattern of evolution of the synonymous sites in the coding  
235 sequences compared to the non-synonymous sites. The number of KAP1 amino acid changes  
236 present within and between species makes it difficult to consistently call sites as synonymous or  
237 non-synonymous, so third codon positions were used as a proxy for synonymous sites, and first  
238 and second codon positions were used as a proxy for non-synonymous sites. We generated  
239 phylogenetic trees from multiple sequence alignments of the first-second (which we refer to as  
240 “non-synonymous”), and third (which we refer to as “synonymous”) codon sites of the *KRTAPI-*  
241 *n* coding regions to test for different evolutionary patterns. Surprisingly, while the non-  
242 synonymous sites displayed a pattern of concerted evolution as was expected (**Figure 4A**), the  
243 synonymous sites also revealed the same pattern of concerted evolution (**Figure 4B**). The  
244 concerted evolution pattern for the synonymous sites seems to be stronger than that of the non-  
245 synonymous sites, as they separate sheep and cattle into separate clades, and also resolve dog,  
246 elephant, and rat/mouse into separate clades (**Figure 4**).

247 **Codon adaptation:** We considered whether this pattern of concerted evolution amongst the  
248 synonymous sites might result from codon adaptation (Lin, et al. 2006), as a result of  
249 synonymous mutations being selected to follow changes in the favoured codons between species.  
250 The *KRTAPI-n* genes display strong evidence for codon adaptation (the degree to which the  
251 favoured codons for that species are used in a gene). For example, the human *KRTAPI-n* genes  
252 collectively show a codon adaptation index (CAI) of 0.91 (out of a maximum of 1), higher than  
253 the CAI of randomly permuted human *KRTAPI* sequences (CAI=0.78). Using the *KRTAPI*  
254 coding sequence alignment used for the phylogenies presented in **Figure 3**, we identified nine  
255 synonymous differences between human and mouse that exhibit a concerted evolution pattern  
256 (similarity within species versus difference between species). If codon adaptation can explain

257 this pattern, these synonymous mutations should change in a manner consistent with a change in  
258 codon usage preference for that amino acid. Five of these mutations show the pattern expected,  
259 given the change in codon usage between human and mouse (synonymous change creates the  
260 more favoured codon in the species it is found in). However, four of these mutations show the  
261 opposite pattern, and most of the codon usage preference changes between human and mouse are  
262 small (**Table S2**). These results provide no evidence for adaptation to different codon usage  
263 preferences driving the pattern of *KRTAPI* concerted evolution.

264 **Reverse transcription of *KRTAPI* mRNA:** Another potential explanation for the incongruence  
265 in evolutionary pattern between the *KRTAPI* coding and flanking regions is reverse transcription  
266 of *KRTAPI-n* mRNAs, followed by homologous recombination-mediated replacement of a  
267 genomic *KRTAPI-n* with the reverse transcribed copy (Coulombe-Huntington and Majewski  
268 2007). This is feasible given that *KRTAPI-n* are single-exon genes. If reverse transcription  
269 events occur, the 5' and particularly 3' flanking regions should show a concerted evolution  
270 pattern that is similar to the coding region. Inspection of the 5' and 3' flanking regions revealed  
271 that sequence similarity between *KRTAPI-n* sequences within a genome tends to decay  
272 immediately upstream of the ATG codon and downstream of the stop codon (**Figure 5**). This  
273 suggests that reverse transcription/integration of *KRTAPI-n* mRNA is unlikely to explain the  
274 pattern of *KRTAPI* concerted evolution, as the transcribed flanking regions of the gene would be  
275 expected to 'hitch-hike' with the coding regions through such a mechanism.

276 We also considered whether the *KRTAPI-n* sequences might have arisen through a pure birth-  
277 and-death process by independent gene duplication events. However, we think this is improbable  
278 as it would require the same number of duplications to occur in at least seven of the species, and,  
279 independently, that each of these duplications would not involve any flanking sequence

280 (including promoter and terminator sequences) and have inserted into the same site in each  
281 species.

282 **Gene conversion:** Finally, we considered whether gene conversion could explain the pattern of  
283 *KRTAPI* repeat evolution. Gene conversion events within a genome that convert a section of one  
284 repeat to the sequence of another can create homogeneity (Chen, et al. 2007), and the degree of  
285 homogeneity depends on the relative rates of gene conversion and mutation (Teshima and Innan  
286 2004; Harpak, et al. 2017). Our results imply that if gene conversion does occur, it is somehow  
287 restricted to the coding region. This pattern could occur if there is selective pressure to maintain  
288 a degree of intra-genome homogeneity between the repeat copies. If so, under the assumption  
289 that gene conversion occurs in both the coding and flanking regions, those events occurring in  
290 the flanking region will not have a selective advantage, while those occurring in the coding  
291 region will. Therefore, the probability of gene conversion events becoming fixed in the  
292 population will be greater for events that involve the coding region. There is considerable intra-  
293 genomic variation between *KRTAPI* repeats (**Figure 3**), but this incomplete level of  
294 homogenization can be explained by relatively infrequent gene conversion events and/or relative  
295 infrequent fixation of these events. Therefore, the sequence features of the *KRTAPI* repeats that  
296 we document here can all be accounted for by gene conversion coupled with selection.

297

### 298 **Evidence for gene conversion events in the *KRTAPI-n* repeats**

299 Inspection of the *KRTAPI* coding region multiple sequence alignment provides evidence for  
300 tracts of gene conversion. Specifically, sites where there are mutations that are shared between  
301 copies within a species, but that differ between species, are frequently clustered together rather

302 than scattered throughout the gene (**Figure 6**). Such patches of homogeneity are expected if there  
303 has been occasional, short-tract gene conversion events. The patches we observe are small, but  
304 are within the expected range for mammalian gene conversion events (Chen, et al. 2007). In  
305 addition, we collected population polymorphism data for *KRTAPI-n* sequences in sheep, as  
306 comprehensive sequence variation data are scarce in other species. For many of the sites that are  
307 polymorphic, the polymorphism is shared across some, or all, of the *KRTAPI-n* sequences  
308 (**Figure 7**). While we cannot rule out independent mutation events in each *KRTAPI* copy, we  
309 think that gene conversion is a more parsimonious explanation for this observation, particularly  
310 for the polymorphisms at synonymous sites. Gene conversion has also previously been suggested  
311 as an explanation for the pattern of polymorphism in the ovine *KRTAPI* genes (Rogers, et al.  
312 1994). Collectively, our results suggest that the unusual evolutionary pattern of the *KRTAPI*  
313 repeats, where the coding region evolutionary dynamics are uncoupled from those of the flanking  
314 region, is the result of occasional short-tract gene conversion events that are selected for in the  
315 coding region but not the flanking regions, and that drive partial homogenization.

316

317

## 318 **Discussion**

319 Here we have shown that *KRTAPI-n* genes are conserved as a block of four tandem repeats in  
320 mammalian species, and this suggests they derive from a relatively ancient gene-amplification  
321 event or events that probably pre-date mammalian speciation. The four tandem copies display a  
322 strong pattern of concerted evolution in the coding regions, yet the regions flanking show a  
323 normal radiating pattern of evolution. We suggest that this dichotomous pattern of evolution is



324 not the result of purifying selection acting to retard changes to the amino acid sequence, but  
325 instead results from short gene conversion tracts that periodically homogenize sequences  
326 between the four *KRTAPI* genes within a genome.

327 The role of gene conversion is supported by two key pieces of evidence: 1) unique amino acid  
328 tracts that are shared by KAP1 copies within a species, but are unique to that species/group of  
329 related species; and 2) the possession of shared nucleotide variants between *KRTAPI* gene  
330 copies in sheep populations. These results extend previous reports of homogenization via  
331 ongoing short-tract gene conversion events in other protein coding genes (Noonan, et al. 2004;  
332 Lamping, et al. 2017).

333 We propose that gene conversion is being utilized as an unusual form of purifying selection that  
334 prevents accumulation of too much divergence between *KRTAPI* gene copies. We speculate that  
335 homogeneity of the *KRTAPI* coding sequences is beneficial as it enables the production of more  
336 homogenous components of the hair and wool fibre matrix, and thus potentially facilitates better  
337 associations with the keratin intermediate filaments. We cannot, however, rule out the possibility  
338 that individual *KRTAPI* repeats might have functional differences, the signal of which is  
339 overwhelmed by the concerted evolution signal from the majority of the gene. However, we note  
340 that, particularly in dogs, some of the *KRTAPI-n* genes are very similar in sequence. Therefore,  
341 we favour the explanation that *KRTAPI* concerted evolution results from ongoing, stochastic  
342 gene conversion events coupled with selection within the coding region against inter-repeat  
343 heterogeneity.

344 Purifying selection is evident in the *KRTAPI-n* coding regions, as the rate of synonymous  
345 change is about twice that of the non-synonymous rate (**Figure 4**). While this may seem to

346 contradict the similarity in the synonymous and non-synonymous concerted evolution tree  
347 topologies, it can be simply explained by purifying selection acting on residues that are  
348 conserved between species, and thus not contributing to the synapomorphies that influence the  
349 tree topologies. Any gene conversion events that homogenize unfavourable amino acids will be  
350 selected against, thereby preventing deleterious mutations from spreading between copies.  
351 However, this same process also allows tolerable and advantageous amino acid changes to sweep  
352 through the copies (Dover 1982). The *KRTAPI-n* sequences from closely related species (i.e.  
353 human and macaque, rat and mouse, sheep and cattle) were not separated into different clades for  
354 most of the phylogenetic trees we generated (**Figures 3 and 4**). This suggests that the rate of  
355 homogenization is relatively slow, and insufficient to drive substantial homogeneity over the  
356 evolutionary time frames separating these species pairs. In this context, the shared  
357 polymorphisms that we observe in sheep (that are evidence for gene conversion events) are likely  
358 intermediate stages in the accumulation of homogenized *KRTAPI-n* sequences.

359 The sharp border between a concerted evolution pattern in the coding region and a radiating  
360 evolution pattern in the immediate flanking regions is striking. This can partially be explained by  
361 the selection for gene conversion events within the coding region, as we have proposed.  
362 However, it is intriguing to speculate that this may also be a consequence of differential  
363 expression between the *KRTAPI* genes that is mediated by copy-specific differences in the  
364 regulatory regions. Although not direct, some evidence for differential regulation of *KRTAPI-n*  
365 gene expression was found in two transcriptome studies looking for differentially expressed  
366 genes (Fan, et al. 2013; Chang, et al. 2014). If the *KRTAPI-n* genes do have functionally distinct  
367 roles, gene conversion events in the *KRTAPI* regulatory regions that perturb their differential  
368 regulation may be maladaptive and therefore selected against. Thus, selective pressure for coding

369 region homogeneity versus regulatory region diversity, coupled with ongoing gene conversion,  
370 may be a powerful way to achieve the dichotomy in evolutionary patterns we observe. Clearly, a  
371 better understanding of the transcriptional regulation of the *KRTAPI* genes is required to address  
372 this hypothesis.

373 Gene conversion is frequently viewed through the lens of impeding sub-functionalization of gene  
374 duplicates. This view is consistent with the well characterized case of the opsin gene duplicates  
375 in primates, where there is a much stronger signal of gene conversion/concerted evolution in the  
376 introns, than in the exons (Shyue, et al. 1994; Hiwatashi, et al. 2011). The interpretation is that  
377 selection has largely rejected gene conversion events that include the coding (exon) regions,  
378 whilst allowing those occurring in the non-coding (intron) regions to spread in the population  
379 (Shyue, et al. 1994). This is the opposite of what we observe, and illustrates how gene  
380 conversion and selection can intersect to produce a constellation of evolutionary patterns:  
381 homogenization of the non-coding but not the coding regions in the opsin paralogs (Shyue, et al.  
382 1994); homogenization of the coding but not the non-coding regions in the *KRTAPI* genes (this  
383 study); and homogenisation of both coding and non-coding regions equally in the ribosomal  
384 RNA gene repeats (Ganley and Kobayashi 2007).

385 The extent to which gene conversion acts to homogenize gene duplicates remains controversial  
386 (Gao and Innan 2004; Casola, et al. 2012; Harpak, et al. 2017). Furthermore, even in examples  
387 where recurrent gene conversion events can be detected, they are often not sufficient to produce  
388 a strong concerted evolution pattern (Petronella and Drouin 2011, 2014). There are two potential  
389 explanations for why such a strong pattern of concerted evolution is observed in the case the  
390 *KRTAPI* genes, despite the relatively high levels of divergence between copies. First, unlike  
391 many of the examples that have aroused controversy (Gao and Innan 2004; Casola, et al. 2012;

392 Harpak, et al. 2017), the *KRTAPI-n* repeats are tandemly-arranged. Proximity effects as a  
393 consequence of tandem arrangement may increase the chances of unequal alignment of the  
394 repeats during DNA repair-based homologous recombination compared to dispersed repeats, and  
395 thus may increase the chances of inter-repeat gene conversion events. However, this does not  
396 explain examples where tandemly repeated paralogs do not show a strong concerted evolution  
397 pattern (Nei, et al. 2000; Perina, et al. 2011). A second explanation relates to the imperfect  
398 decapeptide tandem repeat motif found in the coding region. Variation in the copy number of  
399 decapeptide repeats between *KRTAPI* genes is possibly the result of unequal recombination  
400 (Liao and Weiner 1995; Ganley and Scott 1998; Morrill, et al. 2016). If so, the *KRTAPI* genes  
401 may harbour a recombination hotspot that drives both decapeptide repeat copy number variation  
402 and gene conversion at higher than average levels.

403 Repeats are ubiquitous denizens of eukaryote genomes, where they exist in different forms  
404 (coding, non-coding) and organizations (tandem, dispersed). Our results add to the growing list  
405 of examples that illustrate how different molecular and evolutionary processes can impinge on  
406 repeats to structure their sequences and create distinctive patterns of evolution (Shyue, et al.  
407 1994; Noonan, et al. 2004; Ganley and Kobayashi 2007; Storz, et al. 2007; Hiwatashi, et al.  
408 2011; Lamping, et al. 2017). However, it is unclear how widespread these sorts of evolutionary  
409 dynamics are for eukaryotic gene repeats, largely because the patterns of evolution have not been  
410 investigated for the vast majority of multi-gene families. The increasing availability of high  
411 quality genome sequences for a wide range of eukaryotes puts us in an excellent position to  
412 determine, on a much more systematic and wide-ranging basis, the patterns of repeat sequence  
413 dynamics and evolution. This will, in turn, make it clear whether the impact of recombination on

414 the *KRTAPIs* is unusual, or highlights a common mechanism to finely scale patterns of  
415 homogeneity and divergence between repeat copies over time.

416

417

## 418 **References**

419 Bailey TL, Williams N, Misleh C, Li WW. 2006. MEME: discovering and analyzing DNA and  
420 protein sequence motifs. *Nucleic Acids Res.* 34:W369-373.

421 Britten RJ, Kohne DE. 1968. Repeated sequences in DNA. *Science* 161:529-540.

422 Brown DD, Wensink PC, Jordan E. 1972. A comparison of the ribosomal DNA's of *Xenopus*  
423 *laevis* and *Xenopus mulleri*: the evolution of tandem genes. *J. Mol. Biol.* 63:57-73.

424 Casola C, Conant GC, Hahn MW. 2012. Very low rate of gene conversion in the yeast genome.  
425 *Mol. Biol. Evol.* 29:3817-3826.

426 Chang TH, Huang HD, Ong WK, Fu YJ, Lee OK, Chien S, Ho JH. 2014. The effects of actin  
427 cytoskeleton perturbation on keratin intermediate filament formation in mesenchymal  
428 stem/stromal cells. *Biomaterials* 35:3934-3944.

429 Chen JM, Cooper DN, Chuzhanova N, Ferec C, Patrinos GP. 2007. Gene conversion:  
430 mechanisms, evolution and human disease. *Nature Reviews Genetics* 8:762-775.

431 Coulombe-Huntington J, Majewski J. 2007. Characterization of intron loss events in mammals.  
432 *Genome Res.* 17:23-32.

433 Dover GA. 1982. Molecular drive: a cohesive mode of species evolution. *Nature* 299:111-117.

434 Eirin-Lopez JM, Rebordinos L, Rooney AP, Rozas J. 2012. The birth-and-death evolution of  
435 multigene families revisited. *Genome Dynamics* 7:170-196.

- 436 Elder JF, Jr., Turner BJ. 1995. Concerted evolution of repetitive DNA sequences in eukaryotes.  
437 Q. Rev. Biol. 70:297-320.
- 438 Fan R, Xie J, Bai J, Wang H, Tian X, Bai R, Jia X, Yang L, Song Y, Herrid M, et al. 2013. Skin  
439 transcriptome profiles associated with coat color in sheep. BMC Genomics 14:389.
- 440 Ganley ARD, Kobayashi T. 2007. Highly efficient concerted evolution in the ribosomal DNA  
441 repeats: total rDNA repeat variation revealed by whole-genome shotgun sequence data. Genome  
442 Res. 17:184-191.
- 443 Ganley ARD, Scott B. 1998. Extraordinary ribosomal spacer length heterogeneity in a  
444 Neotyphodium endophyte hybrid: implications for concerted evolution. Genetics 150:1625-1637.
- 445 Gao L-Z, Innan H. 2004. Very low gene duplication rate in the yeast genome. Science 306:1367-  
446 1370.
- 447 Gong H, Zhou H, Forrest RHJ, Li S, Wang J, Dyer JM, Luo Y, Hickford JGH. 2016. Wool  
448 keratin-associated protein genes in sheep—a review. Genes 7:24.
- 449 Gong H, Zhou H, Hickford JGH. 2010. Polymorphism of the ovine keratin-associated protein 1-  
450 4 gene (KRTAP1-4). Mol. Biol. Rep. 37:3377-3380.
- 451 Gong H, Zhou H, Hodge S, Dyer JM, Hickford JGH. 2015. Association of wool traits with  
452 variation in the ovine KAP1-2 gene in Merino cross lambs. Small Rumin. Res. 124:24-29.
- 453 Gong H, Zhou H, McKenzie GW, Hickford JG, Yu Z, Clerens S, Dyer JM, Plowman JE. 2010.  
454 Emerging issues with the current keratin-associated protein nomenclature. International Journal  
455 of Trichology 2:104-105.
- 456 Gong H, Zhou H, McKenzie GW, Yu Z, Clerens S, Dyer JM, Plowman JE, Wright MW, Arora  
457 R, Bawden CS. 2012. An updated nomenclature for keratin-associated proteins (KAPs). Int. J.  
458 Biol. Sci. 8:258-264.

- 459 Gong H, Zhou H, Yu Z, Dyer J, Plowman JE, Hickford J. 2011. Identification of the ovine  
460 keratin-associated protein KAP1-2 gene (KRTAP1-2). *Exp. Dermatol.* 20:815-819.
- 461 Guindon S, Dufayard JF, Lefort V, Anisimova M, Hordijk W, Gascuel O. 2010. New algorithms  
462 and methods to estimate maximum-likelihood phylogenies: assessing the performance of PhyML  
463 3.0. *Syst. Biol.* 59:307-321.
- 464 Harpak A, Lan X, Gao Z, Pritchard JK. 2017. Frequent nonallelic gene conversion on the human  
465 lineage and its effect on the divergence of gene duplicates. *PNAS* 114:12779-12784.
- 466 Hiwatashi T, Mikami A, Katsumura T, Suryobroto B, Perwitasari-Farajallah D, Malaivijitnond  
467 S, Siriaroonrat B, Oota H, Goto S, Kawamura S. 2011. Gene conversion and purifying selection  
468 shape nucleotide variation in gibbon L/M opsin genes. *BMC Evol. Biol.* 11:312.
- 469 Itenge-Mweza TO, Forrest RH, McKenzie GW, Hogan A, Abbott J, Amofo O, Hickford JG.  
470 2007. Polymorphism of the KAP1.1, KAP1.3 and K33 genes in Merino sheep. *Mol. Cell. Probes*  
471 21:338-342.
- 472 Katoh K, Standley DM. 2013. MAFFT multiple sequence alignment software version 7:  
473 improvements in performance and usability. *Mol. Biol. Evol.* 30:772-780.
- 474 Khan I, Maldonado E, Vasconcelos V, Stephen JO, Johnson WE, Antunes A. 2014. Mammalian  
475 keratin associated proteins (KRTAPs) subgenomes: disentangling hair diversity and adaptation to  
476 terrestrial and aquatic environments. *BMC Genomics* 15:779.
- 477 Lamping E, Zhu JY, Niimi M, Cannon RD. 2017. Role of ectopic gene conversion in the  
478 evolution of a *Candida krusei* pleiotropic drug resistance transporter family. *Genetics* 205:1619-  
479 1639.

- 480 Li S, Zhou H, Gong H, Zhao F, Hu J, Luo Y, Hickford JGH. 2017. Identification of the ovine  
481 keratin-associated protein 26-1 gene and its association with variation in wool traits. *Genes*  
482 8:225.
- 483 Li S, Zhou H, Gong H, Zhao F, Wang J, Liu X, Luo Y, Hickford JGH. 2017. Identification of the  
484 ovine keratin-associated protein 22-1 (KAP22-1) gene and its effect on wool traits. *Genes* 8:27.
- 485 Li S, Zhou H, Gong H, Zhao F, Wang J, Luo Y, Hickford JGH. 2017. Variation in the ovine  
486 KAP6-3 gene (KRTAP6-3) is associated with variation in mean fibre diameter-associated wool  
487 traits. *Genes* 8:204.
- 488 Liao D. 1999. Concerted evolution: molecular mechanism and biological implications. *Am. J.*  
489 *Hum. Genet.* 64:24-30.
- 490 Liao D, Weiner AM. 1995. Concerted evolution of the tandemly repeated genes encoding  
491 primate U2 small nuclear RNA (the RNU2 locus) does not prevent rapid diversification of the  
492 (CT)<sub>n</sub>(GA)<sub>n</sub> microsatellite embedded within the U2 repeat unit. *Genomics* 30:583-593.
- 493 Lin Y-S, Byrnes JK, Hwang J-K, Li W-H. 2006. Codon-usage bias versus gene conversions in  
494 the evolution of yeast duplicate genes. *PNAS* 103:14412-14416.
- 495 Lopez-Flores I, Garrido-Ramos MA. 2012. The repetitive DNA content of eukaryotic genomes.  
496 *Genome Dynamics* 7:1-28.
- 497 Morrill SA, Exner AE, Babokhov M, Reinfeld BI, Fuchs SM. 2016. DNA instability maintains  
498 the repeat length of the yeast RNA polymerase II C-terminal domain. *J. Biol. Chem.* 291:11540-  
499 11550.
- 500 Nakamura Y, Gojobori T, Ikemura T. 2000. Codon usage tabulated from international DNA  
501 sequence databases: status for the year 2000. *Nucleic Acids Res.* 28:292.



- 502 Nei M, Gu X, Sitnikova T. 1997. Evolution by the birth-and-death process in multigene families  
503 of the vertebrate immune system. PNAS 94:7799-7806.
- 504 Nei M, Rogozin IB, Piontkivska H. 2000. Purifying selection and birth-and-death evolution in  
505 the ubiquitin gene family. PNAS 97:10866-10871.
- 506 Nei M, Rooney AP. 2005. Concerted and birth-and-death evolution of multigene families. Annu.  
507 Rev. Genet. 39:121-152.
- 508 Noonan JP, Grimwood J, Schmutz J, Dickson M, Myers RM. 2004. Gene conversion and the  
509 evolution of protocadherin gene cluster diversity. Genome Res. 14:354-366.
- 510 Perina A, Seoane D, Gonzalez-Tizon AM, Rodriguez-Farina F, Martinez-Lage A. 2011.  
511 Molecular organization and phylogenetic analysis of 5S rDNA in crustaceans of the genus  
512 *Pollicipes* reveal birth-and-death evolution and strong purifying selection. BMC Evol. Biol.  
513 11:304.
- 514 Petronella N, Drouin G. 2011. Gene conversions in the growth hormone gene family of primates:  
515 stronger homogenizing effects in the Hominidae lineage. Genomics 98:173-181.
- 516 Petronella N, Drouin G. 2014. Purifying selection against gene conversions in the folate receptor  
517 genes of primates. Genomics 103:40-47.
- 518 Piontkivska H, Rooney AP, Nei M. 2002. Purifying selection and birth-and-death evolution in  
519 the histone H4 gene family. Mol. Biol. Evol. 19:689-697.
- 520 Powell BC, Rogers GE. 1997. The role of keratin proteins and their genes in the growth,  
521 structure and properties of hair. In. Formation and structure of human hair: Birkhäuser Verlag. p.  
522 59-148.
- 523 Puigbo P, Bravo IG, Garcia-Vallve S. 2008. CAIcal: a combined set of tools to assess codon  
524 usage adaptation. Biol. Direct 3:38.

- 525 Richard GF, Kerrest A, Dujon B. 2008. Comparative genomics and molecular dynamics of DNA  
526 repeats in eukaryotes. *Microbiol. Mol. Biol. Rev.* 72:686-727.
- 527 Rogers GR, Hickford JGH, Bickerstaffe R. 1994. Polymorphism in two genes for B2 high sulfur  
528 proteins of wool. *Anim. Genet.* 25:407-415.
- 529 Rogers MA, Langbein L, Praetzel-Wunder S, Winter H, Schweizer J. 2006. Human hair keratin-  
530 associated proteins (KAPs). *Int. Rev. Cytol.* 251:209-263.
- 531 Rogers MA, Schweizer J. 2005. Human KAP genes, only the half of it? Extensive size  
532 polymorphisms in hair keratin-associated protein genes. *J. Invest. Dermatol.* 124:vii-ix.
- 533 Rooney AP, Ward TJ. 2005. Evolution of a large ribosomal RNA multigene family in  
534 filamentous fungi: birth and death of a concerted evolution paradigm. *PNAS* 102:5084-5089.
- 535 Shimomura Y, Aoki N, Schweizer J, Langbein L, Rogers MA, Winter H, Ito M. 2002.  
536 Polymorphisms in the human high sulfur hair keratin-associated protein 1, KAP1, gene family. *J.*  
537 *Biol. Chem.* 277:45493.
- 538 Shyue SK, Li L, Chang BH, Li W-H. 1994. Intronic gene conversion in the evolution of human  
539 X-linked color vision genes. *Mol. Biol. Evol.* 11:548-551.
- 540 Stein LD. 2004. End of the beginning. *Nature* 431:915-916.
- 541 Stephan W. 1989. Tandem-repetitive noncoding DNA: Forms and forces. *Mol. Biol. Evol.*  
542 6:198-212.
- 543 Storz JF, Baze M, Waite JL, Hoffmann FG, Opazo JC, Hayes JP. 2007. Complex signatures of  
544 selection and gene conversion in the duplicated globin genes of house mice. *Genetics* 177:481–  
545 500.
- 546 Talavera G, Castresana J. 2007. Improvement of phylogenies after removing divergent and  
547 ambiguously aligned blocks from protein sequence alignments. *Syst. Biol.* 56:564-577.

- 548 Tao J, Zhou H, Gong H, Yang Z, Ma Q, Cheng L, Ding W, Li Y, Hickford JGH. 2017. Variation  
549 in the KAP6-1 gene in Chinese Tan sheep and associations with variation in wool traits. *Small*  
550 *Rumin. Res.* 154:129-132.
- 551 Tao J, Zhou H, Yang Z, Gong H, Ma Q, Ding W, Li Y, Hickford JGH. 2017. Variation in the  
552 KAP8-2 gene affects wool crimp and growth in Chinese Tan sheep. *Small Rumin. Res.* 149:77-  
553 80.
- 554 Teshima KM, Innan H. 2004. The effect of gene conversion on the divergence between  
555 duplicated genes. *Genetics* 166:1553-1560.
- 556 Torrents D, Suyama M, Zdobnov E, Bork P. 2003. A genome-wide survey of human  
557 pseudogenes. *Genome Res.* 13:2559-2567.
- 558 Wernersson R, Pedersen AG. 2003. RevTrans: Multiple alignment of coding DNA from aligned  
559 amino acid sequences. *Nucleic Acids Res.* 31:3537-3539.
- 560 Wu DD, Irwin D, Zhang YP. 2008. Molecular evolution of the keratin associated protein gene  
561 family in mammals, role in the evolution of mammalian hair. *BMC Evol. Biol.* 8:241.
- 562 Yu G, Smith DK, Zhu H, Guan Y, Lam TT-Y. 2017. GGTREE: an R package for visualization  
563 and annotation of phylogenetic trees with their covariates and other associated data. *Methods*  
564 *Ecol. Evol.* 8:28–36.
- 565 Zhou H, Gong H, Li S, Luo Y, Hickford J. 2015. A 57-bp deletion in the ovine KAP6-1 gene  
566 affects wool fibre diameter. *Journal of Animal Breeding and Genetics.*
- 567 Zhou H, Gong H, Wang J, Dyer JM, Luo Y, Hickford JGH. 2016. Identification of four new  
568 gene members of the KAP6 gene family in sheep. *Sci. Rep.* 6:24074.

569

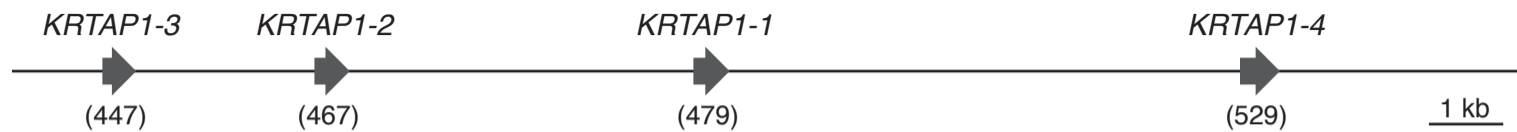

**Figure 1. Tandem repeat organization of the keratin associated protein-1 (*KRTAP1*) genes**  
The organization of mammalian *KRTAP1* genes is illustrated by the arrangement found in sheep. The four *KRTAP1-n* paralogs are represented by arrows that indicate the direction of transcription. Diagram is drawn to scale, with *KRTAP1-n* lengths bracketed below the genes. These repeats are numbered *KRTAP1-1*, 3, 4, and 5 in human.

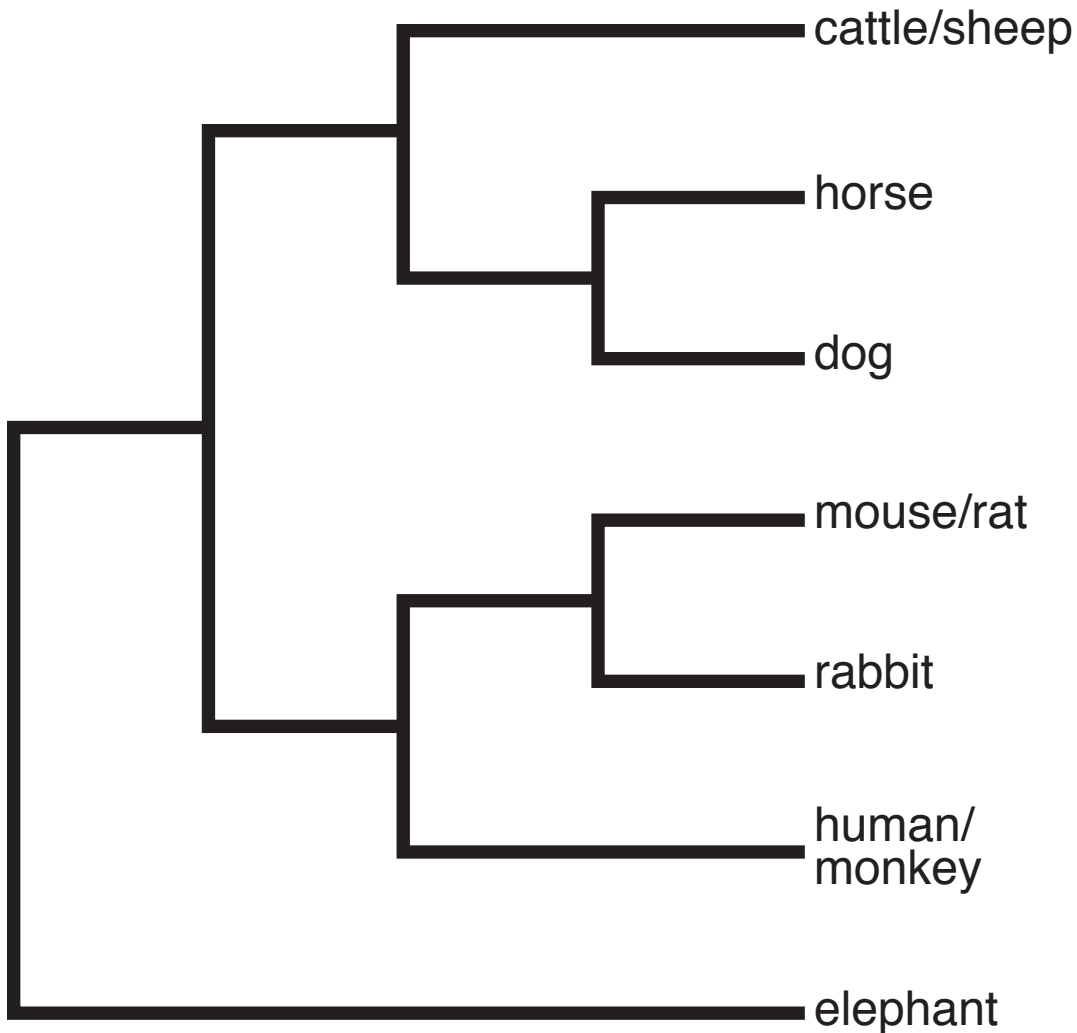

**Figure 2. Mammalian *KRTAP1-n* gene phylogenetic relationships**  
Representative phylogenetic tree illustrating the relationships between the *KRTAP1-n* genes in the species used in this study. Branch lengths are not to scale. The phylogeny is adapted from that presented in McCormack et al. (2012).

0.1

bioRxiv preprint doi: <https://doi.org/10.1101/282418>; this version posted March 27, 2018. The copyright holder for this preprint (which was not certified by peer review) is the author/funder, who has granted bioRxiv a license to display the preprint in perpetuity. It is made available under aCC-BY 4.0 International license.

3-prime flanking

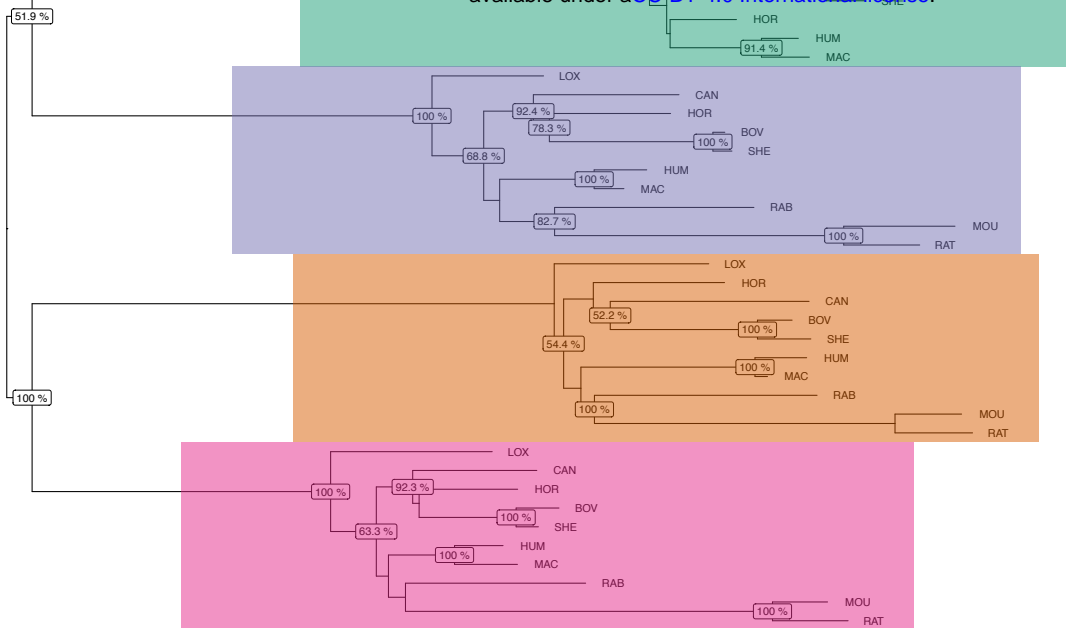

### Figure 3. Phylogenetic trees of *KRTAP1-n* coding and flanking region sequences

Phylogenetic trees were constructed for the mammalian *KRTAP1-n* 5' flanking region, coding region, and 3' flanking region using PhyML. The species are indicated by three-letter abbreviations. The number following this for the coding regions indicates the *KRTAP1-n* gene name. The major clades within the trees are indicated by coloured boxes. The 5' and 3' flanking region phylogenies group by repeat number, while the coding region phylogeny tends to group by species. Numbers on nodes indicate bootstrap supports over 50%, and substitution rates are indicated at the top left. Human *KRTAP1-n* gene names have been altered for consistency with other species.

0.01

coding region

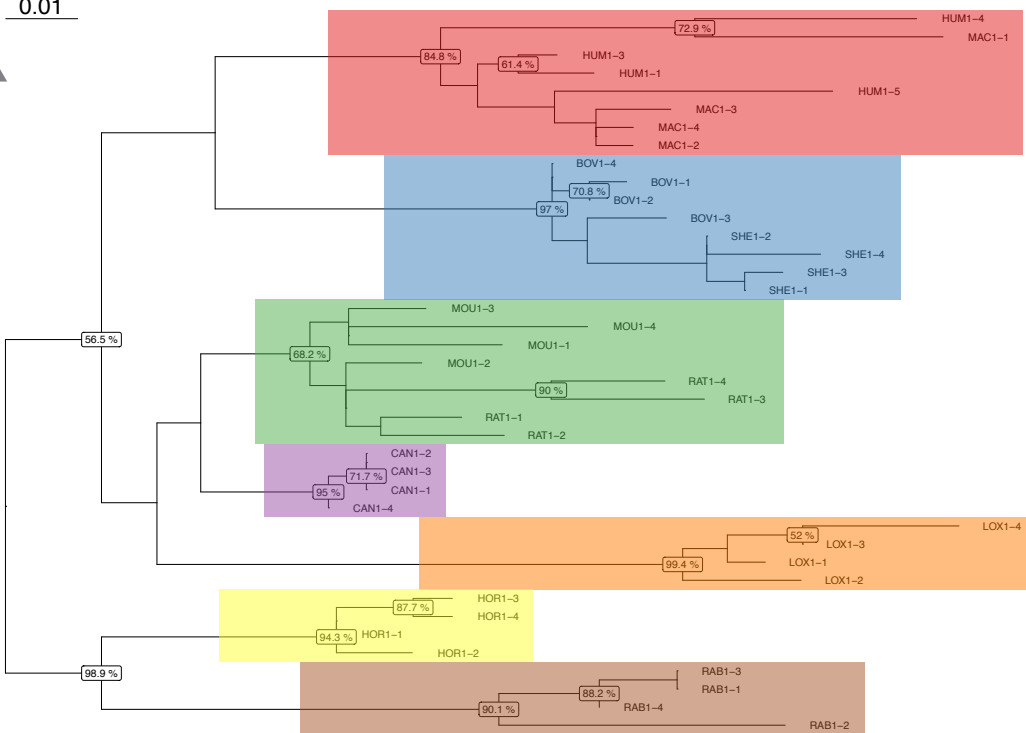

Rabbit Horse Elephant Dog Mouse/Rat Cattle/Sheep Human/Macaque

0.1

5-prime flanking

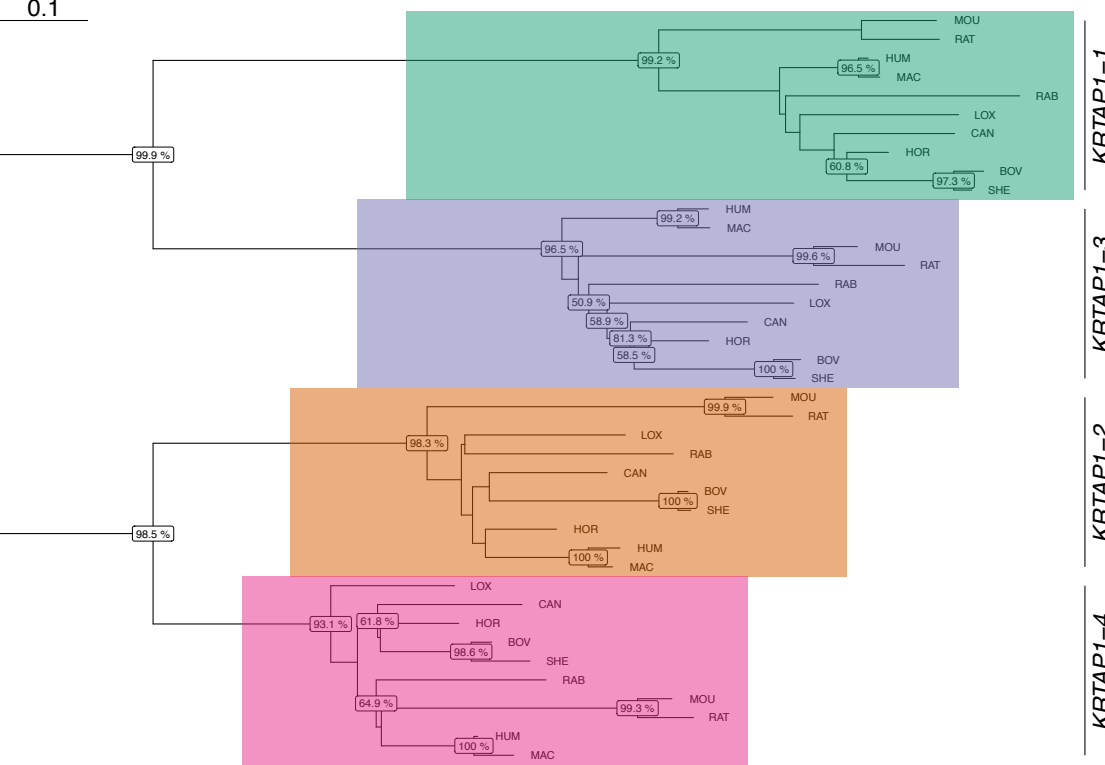

KRTAP1-1  
KRTAP1-3  
KRTAP1-2  
KRTAP1-4

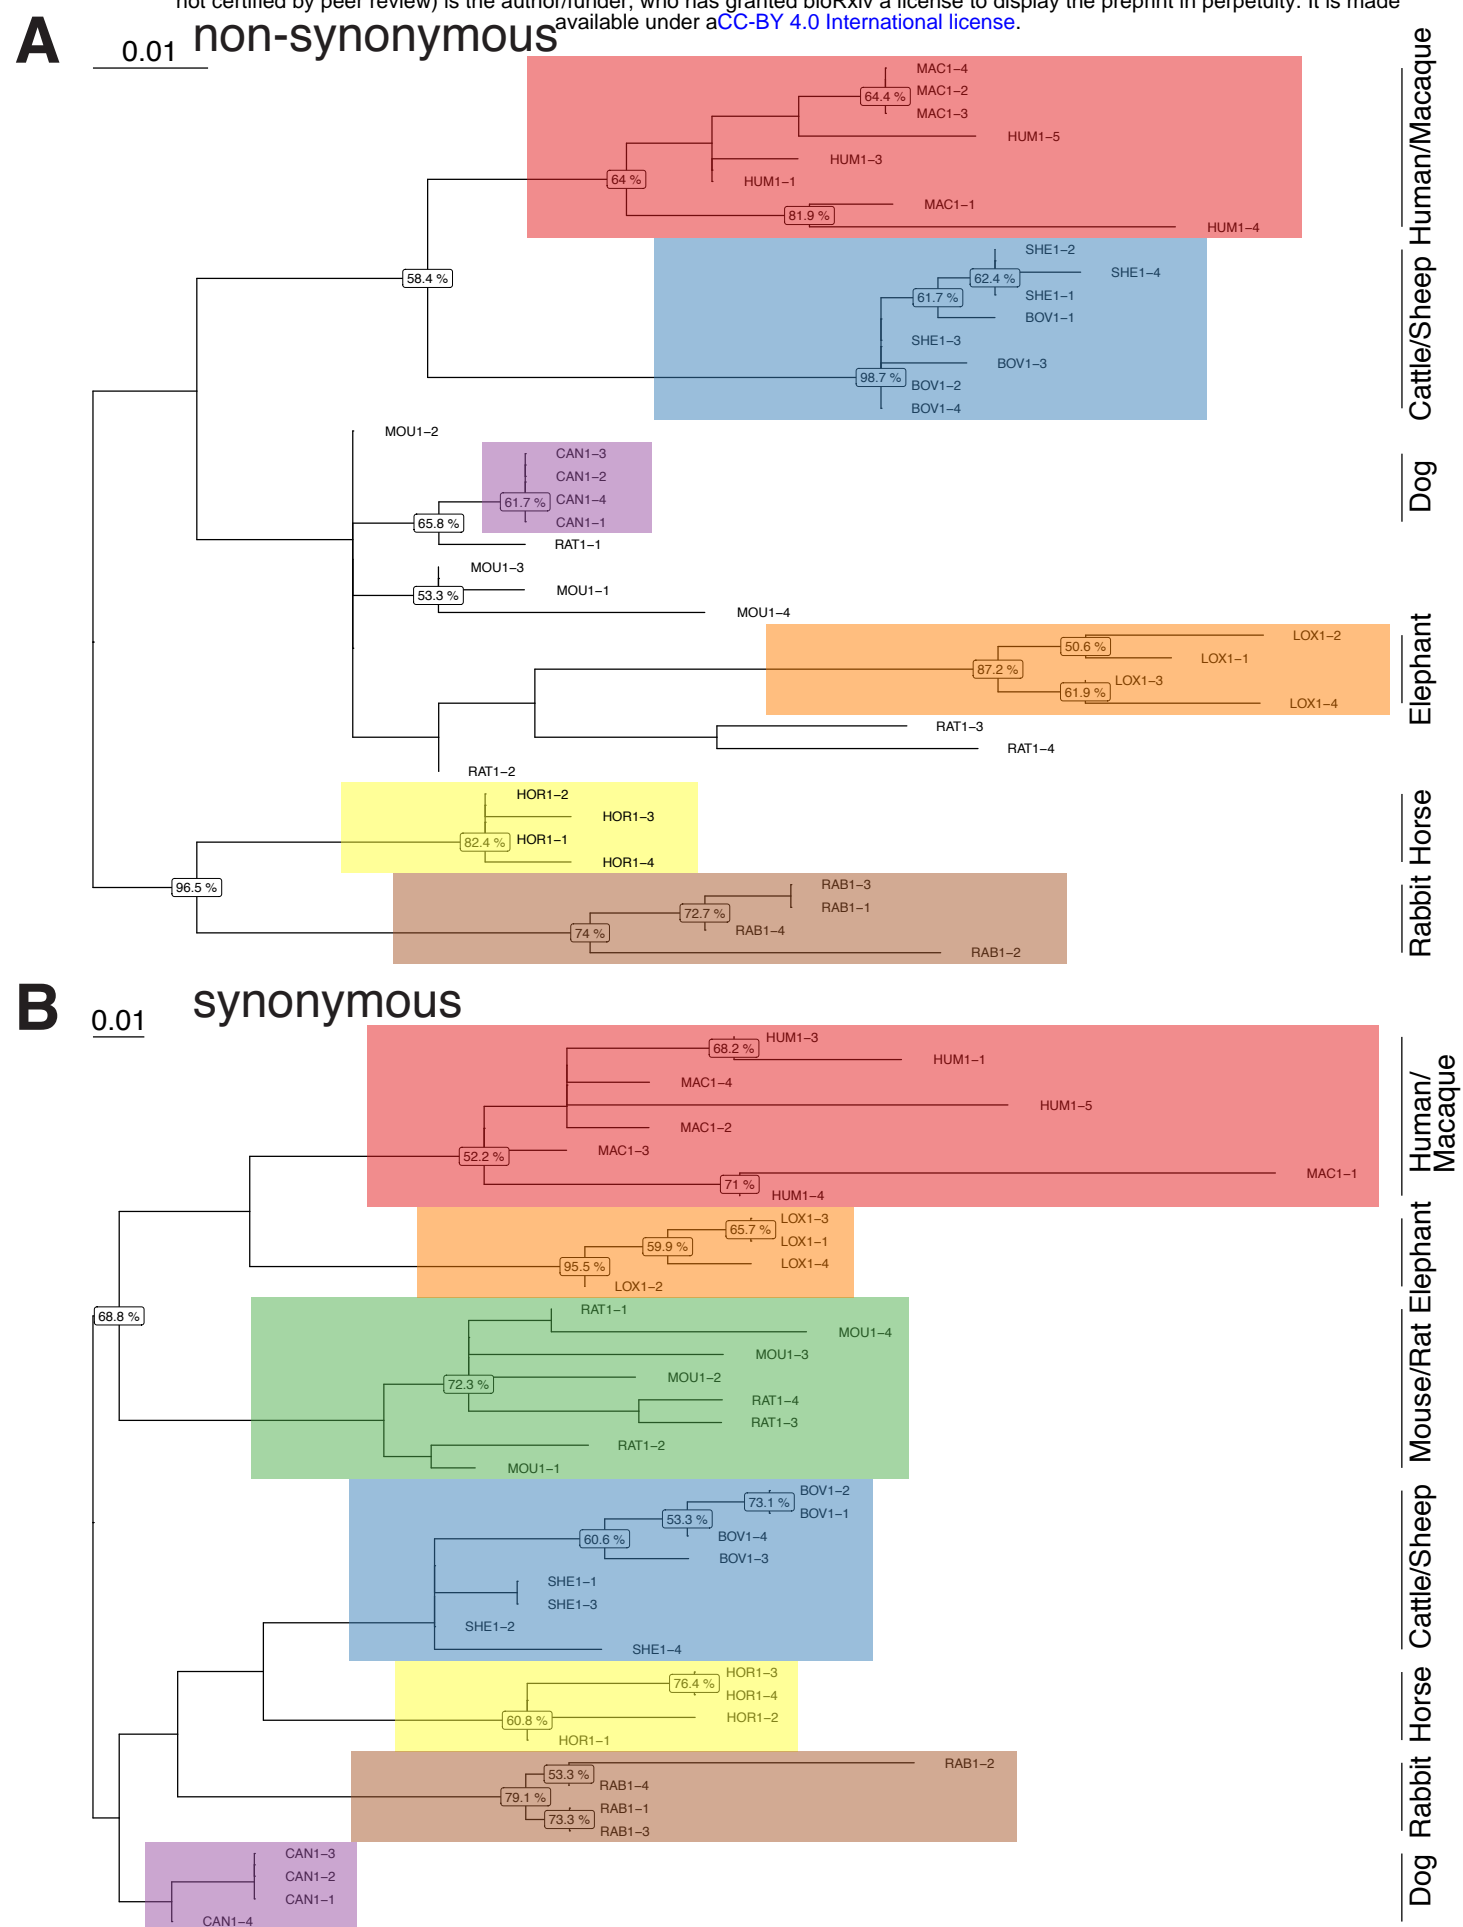

**Figure 4. The *KRTAP1-n* concerted evolution pattern is not explained by purifying selection**

Phylogenetic trees were constructed for the 1st and 2nd codon positions ("non-synonymous"; **A**), and the 3rd codon position ("synonymous"; **B**), as per **Figure 3**. The major clades in both phylogenies tend to group by species, with this concerted evolution pattern being stronger for the synonymous phylogeny. Numbers on nodes indicate bootstrap supports with values over 50%, and substitution rates are indicated at the top left.

**A**

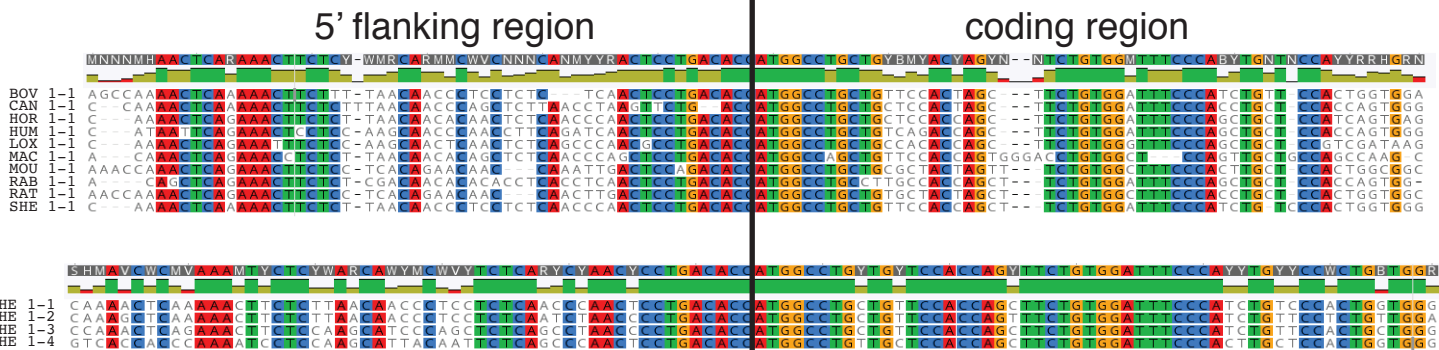

**B**

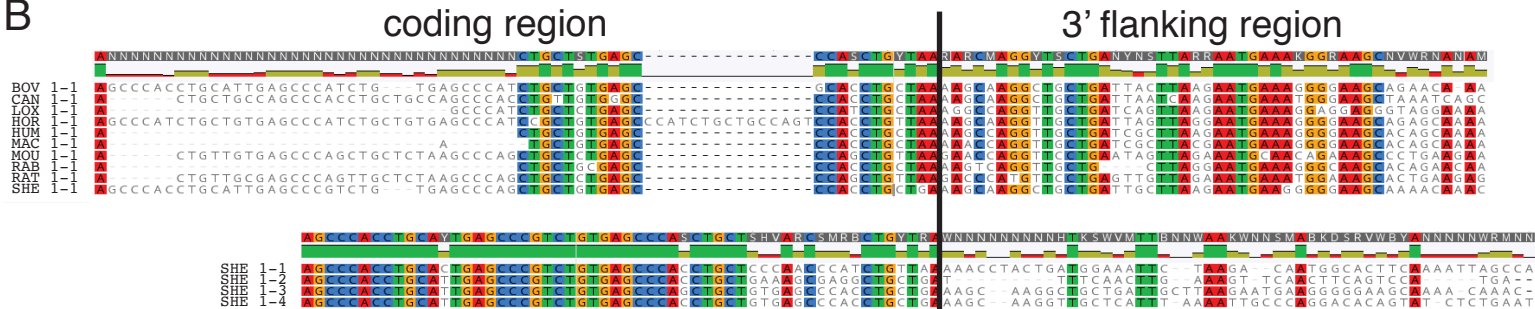

**Figure 5. The switch between concerted and radiating evolution patterns is located close to the start/stop sites**

**A)** Alignment of the region flanking the *KRTAP1-1* gene start site. The boundary between the 5' flanking and coding regions is marked by a vertical line (followed by the ATG). Underneath is an alignment of the same region for all four *KRTAP1-n* sequences from sheep. Mismatches have a white background, conservation is indicated graphically above each alignment, and consensus sequences are shown at the top. **B)** As in **(A)**, except the region flanking the stop site is shown, with the vertical line marking the boundary between the coding and 3' flanking regions (preceded by the stop codon).



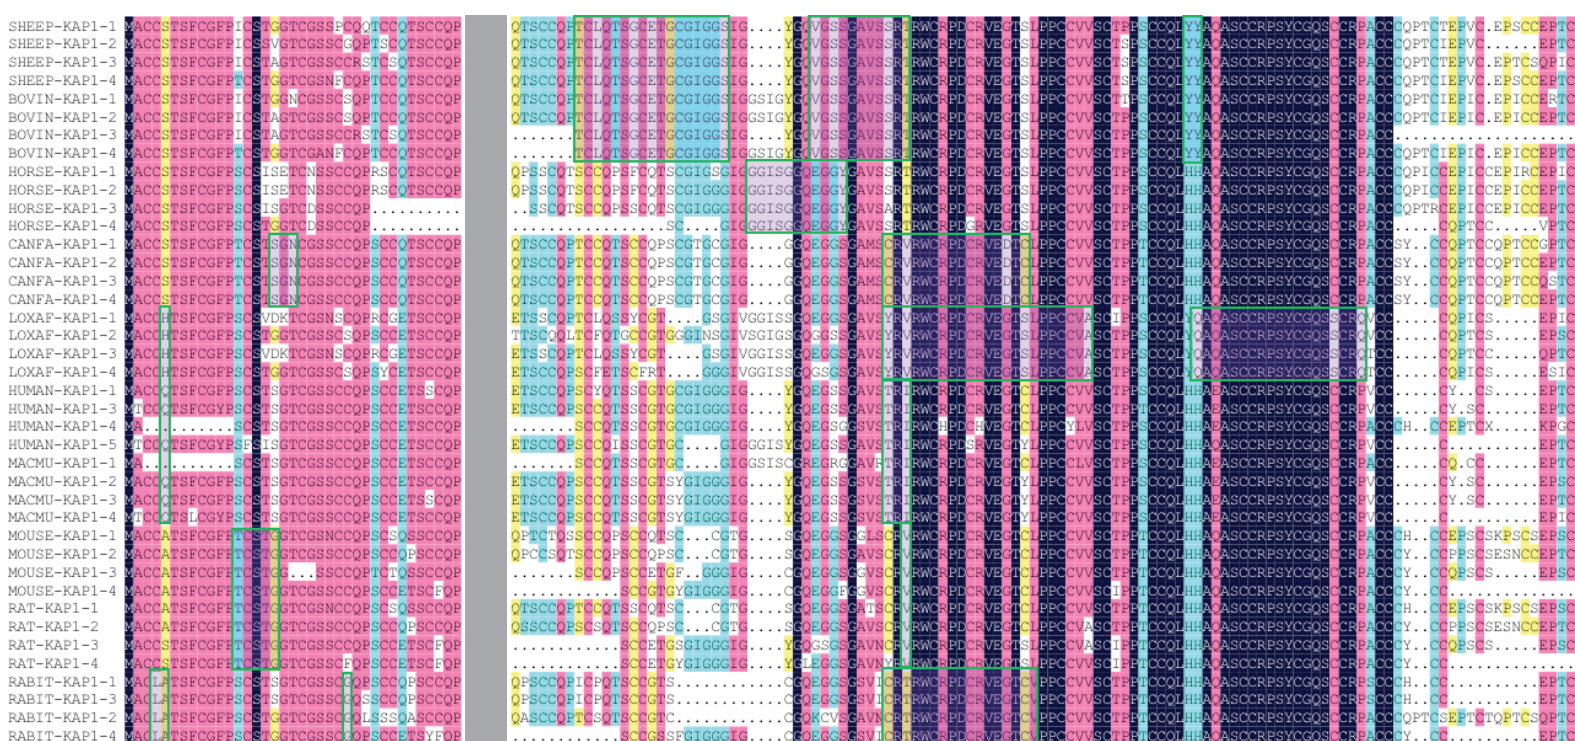

**Figure 6. Evidence for short gene conversion tracts between *KRTAP1-n* sequences within species**  
 Alignment of KAP1 amino acid sequences from the ten mammalian species. Amino acid tracts boxed in green represent sequences unique to a species or related species pairs. The grey vertical box represents the conserved decapeptide repeat sequences (which have been removed). Dots represent gaps in the alignment.

*KRTAP1-1* ATGGCCTGCTGTTCCACCAGCTTCTGTGGATTTCATCTGT**Y**CCTACTGGTGGGACCTGTGGCTCCAGTCCCTGCCAGCMGACCTGCTGC <30 bp repeat>  
*KRTAP1-2* -----T-----T--T--T--A-----CTG-G-----CA---C---- <30 bp repeat>  
*KRTAP1-3* -----**Y**-----C-----CTG-----GATCA-----A-T <30 bp repeat>  
*KRTAP1-4* -----T--C-----CT--CT-----T--ACTTT-----CA----- <30 bp repeat>

*KRTAP1-1* CAGACCAGTGGCTGTGAGAC**S**GGCTGTGGCATTGGTGGCAGCATTGGYTATGGCCAGGTGGGTAGCAGCGGAGCTGTGAGCAGCCGCACCAGGTGGTGCCGCC  
*KRTAP1-2* -----**V**-----**W**-----C--R-----Y-----  
*KRTAP1-3* -----Y--R--**S**-----**Y**--C-----R-----  
*KRTAP1-4* -----**B**-----**W**-----**Y**--RC-----

*KRTAP1-1* CTGACTGCCGCGTGGAGGGCACCAGCCTGCCWCCCTGCTG**Y**GTGGTGGAGCTGCACA**Y**CCCCGTCCTGCTGCCAGCTGTACTATGCCAGGCCTCCTGCTGCCG  
*KRTAP1-2* -----T-----**Y**-----T-----R-----  
*KRTAP1-3* -----R--T-----**Y**-----**Y**-----  
*KRTAP1-4* -----T-----**Y**-----T-----

*KRTAP1-1* CCCATCCTACTGTGGACAGTCCTGCTGCCGCCAGCCTGCTGCT**K**CCAGCCCACCTGC**Y**TGAGCCC**R**TCTGTGAGCCCAGCTGCTGTGAGCCCACCTGCTGA  
*KRTAP1-2* -----G-----T-----G-----**S**-----.....  
*KRTAP1-3* -----G-----**Y**-----G-----C-----CCC-A---T-M-T-A-  
*KRTAP1-4* -----**K**-----T-----**R**-----**S**-----R-----

### Figure 7. Shared polymorphisms between *KRTAP1-n* sequences in sheep

Alignment of the four sheep *KRTAP1-n* coding region sequences. Dashes represent nucleotides identical to the top sequence, and dots represent gaps. The 30 bp repeats are not shown, as the insertion/deletion positions cannot be precisely determined. Shared nucleotide substitutions between repeat copies are highlighted in red.
