# Supplementary material for: Contrasting patterns of coding and flanking region evolution in mammalian keratin associated protein-1 genes
Source: bioRxiv or medRxiv preprint supplement (doi:10.1101/282418), 2018-03-27
Supplement: Supplementary file [file 282418-5.pdf]

**Table S2.** No evidence for codon bias explaining the *KRTAP1* coding region pattern of concerted evolution

| Human variant        | Mouse variant | Human codon usage <sup>a</sup> |      | Mouse codon usage <sup>a</sup> |      | Support <sup>b</sup> |
|----------------------|---------------|--------------------------------|------|--------------------------------|------|----------------------|
| GGC                  | GGT           | 22.3                           | 10.6 | 21.2                           | 11.4 | Dark Green           |
| AGG                  | AGA           | 11.9                           | 12   | 12.2                           | 12.1 | Light Pink           |
| CCA                  | CCT           | 17.3                           | 17.9 | 17.3                           | 18.4 | Dark Green           |
| CGT                  | CGC           | 4.5                            | 10.5 | 4.7                            | 9.4  | Red                  |
| GG(T/C) <sup>c</sup> | GGC           | 10.6                           | 22.3 | 11.4                           | 21.2 | Red                  |
| TG(C/T) <sup>c</sup> | TGT           | 12.2                           | 10.6 | 12.3                           | 11.4 | Light Green          |
| CAC                  | CAT           | 15.2                           | 11.1 | 15.3                           | 10.6 | Red                  |
| CGC                  | CGT           | 10.5                           | 4.5  | 9.4                            | 4.7  | Dark Green           |
| CC(G/A) <sup>c</sup> | CCA           | 7.3                            | 17.3 | 6.2                            | 17.3 | Dark Green           |

a. Value on the left is the codon usage value for the human variant codon; that on the right for the mouse variant codon

b. Dark colors = both codons support/neutral for CAI explaining (green)/not explaining (red) concerted evolution pattern; light colors is where support is opposite for each codon with color representing the dominant effect (in terms of CAI magnitudes)

c. Difference is present in two of the four *KRTAP1* copies. Codon usage values on the left represent the human variant that differs from the mouse
