# Supplementary material for: Contrasting patterns of coding and flanking region evolution in mammalian keratin associated protein-1 genes
Source: bioRxiv or medRxiv preprint supplement (doi:10.1101/282418), 2018-03-27
Supplement: Supplementary file [file media-4.pdf]

**Table S1.** *KRTAP1* sequences from the genomes of the ten mammalian species used in this study.

| Species  | Gene            | GenBank Accession number | Open reading frame               | Strand |
|----------|-----------------|--------------------------|----------------------------------|--------|
| Sheep    | <i>KRTAP1-1</i> | NC_019468.2              | 40766938 – 40767417              | –      |
|          | <i>KRTAP1-2</i> | NC_019468.2              | 40771911 – 40772378              | –      |
|          | <i>KRTAP1-3</i> | NC_019468.2              | 40779170 – 40779617 <sup>a</sup> | –      |
|          | <i>KRTAP1-4</i> | NC_019468.2              | 40764049 – 40764578              | –      |
| Human    | <i>KRTAP1-4</i> | NT_010783.15             | 4460117 – 4460482                | –      |
|          | <i>KRTAP1-3</i> | NT_010783.15             | 4464722 – 4465225                | –      |
|          | <i>KRTAP1-1</i> | NT_010783.15             | 4471268 – 4471801                | –      |
|          | <i>KRTAP1-5</i> | NT_010783.15             | 4457035 – 4457559                | –      |
| Macaque  | <i>KRTAP1-1</i> | NC_027908.1              | 46855931 – 46856296              | –      |
|          | <i>KRTAP1-2</i> | NC_027908.1              | 46862830 – 46863363              | –      |
|          | <i>KRTAP1-3</i> | NC_027908.1              | 46870332 – 46870895              | –      |
|          | <i>KRTAP1-4</i> | NC_027908.1              | 46852802 – 46853326              | –      |
| Dog      | <i>KRTAP1-1</i> | NW_003726075.1           | 3461261 – 3461761                | +      |
|          | <i>KRTAP1-2</i> | NW_003726075.1           | 3453667 – 3454122                | +      |
|          | <i>KRTAP1-3</i> | NW_003726075.1           | 3447783 – 3448238                | +      |
|          | <i>KRTAP1-4</i> | NW_003726075.1           | 3464126 – 3464626                | +      |
| Mouse    | <i>KRTAP1-1</i> | NT_165773.2              | 10985451 – 10986017              | –      |
|          | <i>KRTAP1-2</i> | NT_165773.2              | 10993187 – 10993708              | –      |
|          | <i>KRTAP1-3</i> | NT_165773.2              | 11000033 – 11000443              | –      |
|          | <i>KRTAP1-4</i> | NT_165773.2              | 10982986 – 10983354              | –      |
| Rat      | <i>KRTAP1-1</i> | NW_047339.1              | 1328764 – 1329330                | –      |
|          | <i>KRTAP1-2</i> | NW_047339.1              | 1335870 – 1336391                | –      |
|          | <i>KRTAP1-3</i> | NW_047339.1              | 1342514 – 1342909                | –      |
|          | <i>KRTAP1-4</i> | NW_047339.1              | 1326287 – 1326655                | –      |
| Cattle   | <i>KRTAP1-1</i> | NW_003104496.1           | 1422531 – 1423001                | –      |
|          | <i>KRTAP1-2</i> | NW_003104496.1           | 1427623 – 1428123                | –      |
|          | <i>KRTAP1-3</i> | NW_003104496.1           | 1435218 – 1435584 <sup>b</sup>   | –      |
|          | <i>KRTAP1-4</i> | NW_003104496.1           | 1419706 – 1420146                | –      |
| Horse    | <i>KRTAP1-1</i> | NW_001867366.1           | 20418599 – 20419102              | +      |
|          | <i>KRTAP1-2</i> | NW_001867366.1           | 20412268 – 20412756              | +      |
|          | <i>KRTAP1-3</i> | NW_001867366.1           | 20406496 – 20406924              | +      |
|          | <i>KRTAP1-4</i> | NW_001867366.1           | 20421307 – 20421663              | +      |
| Elephant | <i>KRTAP1-1</i> | NW_003573451.1           | 22936276 – 22936734              | –      |
|          | <i>KRTAP1-2</i> | NW_003573451.1           | 22940301 – 22940897              | –      |
|          | <i>KRTAP1-3</i> | NW_003573451.1           | 22949757 – 22950215              | –      |
|          | <i>KRTAP1-4</i> | NW_003573451.1           | 22933636 – 22934097              | –      |
| Rabbit   | <i>KRTAP1-1</i> | NW_003159313.1           | 19592682 – 19593113              | –      |
|          | <i>KRTAP1-2</i> | NW_003159313.1           | 19599592 – 19600164              | –      |
|          | <i>KRTAP1-3</i> | NW_003159313.1           | 19605619 – 19606050              | –      |
|          | <i>KRTAP1-4</i> | NW_003159313.1           | 19590102 – 19590482              | –      |

<sup>a</sup> the sheep genome assembly accession is missing 11 nucleotides. We used Genbank accession X02925.1 (which has a complete coding region) for the coding sequence, and the genome assembly for the flanking region sequences.

<sup>b</sup> The end of the coding region is missing from the cattle genome assembly. We used Genbank accession XM\_001255391.4 (which has a putatively complete coding region) for the coding sequence, and the genome assembly for the flanking region sequences.
